# Supplementary material
Source: PubMed Central journal article supplement (PMC2740411)

## SUPPLEMENTARY FIGURES AND LEGENDS

**Supplementary Figure 1. ZBTB5 is a POZ-domain Krüppel-like zinc finger (POK) protein.** Nucleotide and amino acid sequences of the ZBTB5 protein (GenBank Accession NP\_055687.1). ZBTB5 is composed of 677 amino acids and contains a N-terminus POZ domain (a.a. 1-123, solid underline) and two zinc fingers, one typical C2H2 and one atypical C2HC types in the C-terminus (a.a. 613-677, dotted underline region with circles).

**Supplementary Figure 2.** (A) Structures of the promoter-luciferase gene constructs of the p53 pathway tested in Figure 1A. Promoters of *ARF*, *HDM2*, *p53*, and *p21* were fused with the luciferase gene of the pGL2-basic vector. Binding sites for transcriptional factors are indicated. +1, Tsp, transcriptional start site. *HDM2*(P2), p53-dependent promoter 2 of *HDM2*. (B) RT-PCR analysis of total RNA isolated from HEK293A and HCT116 cells transfected either with control adenovirus (dl324) or recombinant adenovirus (dl324-ZBTB5) overexpressing ZBTB5. (C) RT-PCR analysis of total RNA isolated from HEK293A cells transfected with either negative control scrambled siRNA or siZBTB5 RNA.

**Supplementary Figure 3.** (A) A diagram showing the homology of amino acid sequences of mammalian ZBTB5 proteins. All mammalian ZBTB5s show a sequence homology greater than 92%. (B) Tissue distribution of mouse *Zbtb5* mRNA expression. RT-PCR analysis of cDNA prepared from total RNA of male FVB mouse tissues. (C) Immunocytochemistry of human FLAG-ZBTB5 in HEK293A cells transfected with FLAG-ZBTB5 expression vector. ZBTB5 was detected in the nucleus.

atggatthttcctggctcaactttgaacaaatcttccagcagctgaactaccagagacttcatggccagctctgtgattgtgtcattgttagtg  
 1 M D F P G H F E Q I F Q Q L N Y Q R L H G Q L C D C V I V V  
 gggaaatagacactttaaagcccaccgctccgtgctggcagcatgcagcaagcatttccgagccctgttctcagtgccagaaggagatcag  
 31 G N R H F K A H R S V L A A C S T H F R A L F S V A E G D Q  
 accatgaacatgatccagctggatagcaggtggtgacagcagagccctttgctgactgattgacatgatgtatacctccacctcatg  
 61 T M N M I Q L D S E V V T A E A F A A L I D M M Y T S T L M  
 ctgggggagagcaatgtaatggatgtcttattggcagcctctcacctgcatttgaactctgttgttaaggcatgtaaacattacttaacg  
 91 L G E S N V M D V L L A A S H L H L N S V V K A C K H Y L T  
 acaaggacgctgccccatgtctccccccagtgagcgcgttcaggagcagagcggccatgcagcgcctctttatgctacagcagctggga  
 121 T R T L P M S P P S E R V Q E Q S A R M Q R S F M L Q Q L G  
 ctaagcatcgtgagctcagccctcaatccagccagaaatggcgaggagcagccagccccatgagctcttccatgcgcagtaacctggat  
 151 L S I V S S A L N S S Q N G E E Q P A P M S S S M R S N L D  
 cagcgcagcccttccccatgagcgccttcaatagcgaagcagctctgcagaggagcgggccaggcagcgcctccgacctccatagat  
 181 Q R T P F P M R R L H K R K Q S A E E R A R Q R L R P S I D  
 gagtctgccattccagatgttacaccggagaatgggccttcagggttcattctcgggagaggttctttaccagattctctgaaaatt  
 211 E S A I S D V T P E N G P S G V H S R E E F F S P D S L K I  
 gtggaataatcctaaagctgatggaatgactgataaccaggaagatagtgcatcattgttgcactcaagaagatgccc  
 241 V D N P K A D G M T D N Q E D S A I M F D Q S F G T Q E D A  
 caggtgcccagccagctctgataacagtgctggcaacatggcacagttgtccatggcctctcgtgcaactcaggttgagactagtttggat  
 271 Q V P S Q S D N S A G N M A Q L S M A S R A T Q V E T S F D  
 caggaatgacacagaaagtagtttccagtgtaaaaccctgaggttgcccttggtgagaaggagcagatgagatggtggtgtaaa  
 301 Q E A A P E K S S F Q C E N P E V G L G E K E H M R V V V K  
 tctgagccctgagctcacctgagcctcaggatgaagtgagcagtgtagcctcacaagcagaaggcagcagctctgtggaagtggaagga  
 331 S E P L S S P E P Q D E V S D V T S Q A E G S E S V E V E G  
 gttgtggtcagtgccgagaagatagacctcagccctgaaagcagtgatcggagtttttcagatccccagctagcacagacagggtagggt  
 361 V V V S A E K I D L S P E S S D R S F S D P Q S S T D R V G  
 gatataccatattttggaagtcacaaaacactagagcataagtcacttttagtatttcgaattttcttaacaagagcagagaaaataac  
 391 D I H I L E V T N N L E H K S T F S I S N F L N K S R G N N  
 tttactgcaaatcagaacaatgatgataatattccaaaaccactagtgactgcaggtgagagtgaggccccctatttggtagtgcca  
 421 F T A N Q N N D D N I P N T T S D C R L E S E A P Y L L S P  
 gaggtcggcctgcaggtggccctcctctgcccctggctcccatgtagagaaccatttagtgaacctgcagactcccactctcgtcagg  
 451 E A G P A G G P S S A P G S H V E N P F S E P A D S H F V R  
 cctatgcaggaggtgatggcctgcctgtgtgacagcttaccaggtaccaaggaggagaacagtttgggatggacttttccaggtctggt  
 481 P M Q E V M G L P C V Q T S G Y Q G G E Q F G M D F S R S G  
 ttggcctccactcctccttctccagggtaatgatagggtcccccaaggggagggagccagtaactttccttactaccgcccagatagctccc  
 511 L G L H S S F S R V M I G S P R G G A S N F P Y Y R R I A P  
 aaaatgccagttgtaactcctcagcaggtccacagatcccagaaaactctaccagttctcagctaatgatgaatggagctacgtcctca  
 541 K M P V T S V R S S Q I P E N S T S S Q L M M N G A T S S  
 tttgaaaatggccatccttcccagcctggccctccacagttgaccagggcatctgcagatgttctgtcaaaagtgaagaaggccttatca  
 571 F E N G H P S Q P G P P Q L T R A S A D V L S K C K K A L S  
 gagcacaatgttttgggtgtagaggagctcgcaagtatgcctgcaaaaactctgctgcaaaaacttttctgactttgacagattgcaagaag  
 601 E H N V L V V E G A R K Y A C K I C K T F L T L T D C K K  
 cacatcctgtttcacacaggtgaaaagccttacgcctgctgaagtgtggcaagaggtttagtcagtcagccacctgtataagcactca  
 631 H I R V H T G E K P Y A C L K C G K R F S Q S S H L Y K H S  
 aagactactgctgctgctggcagagcagcaatcttcccagcactttgctc  
 661 K T T C L R W Q S S N L P S T L L

Supplementary Figure 1. Koh et al. 2009

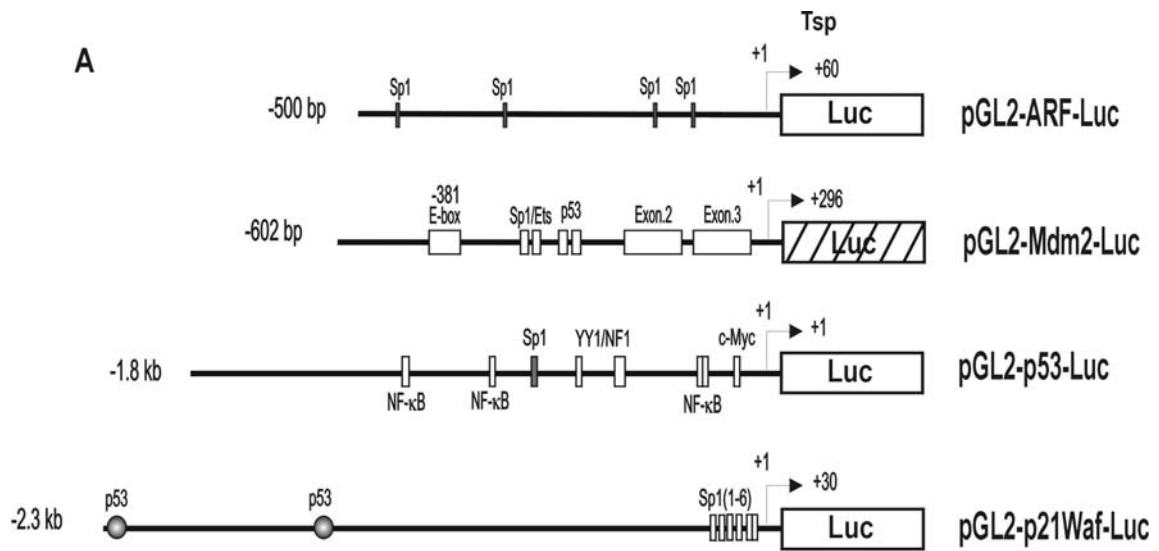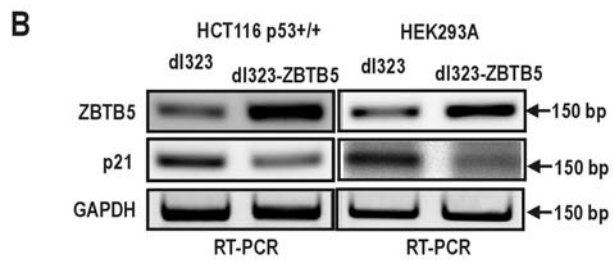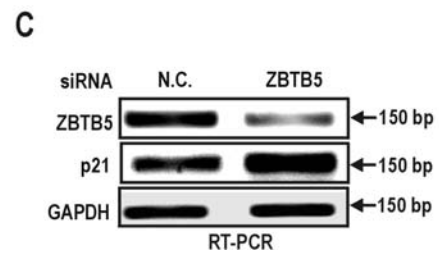

*Supplementary Figure 2. Koh et al. 2009*

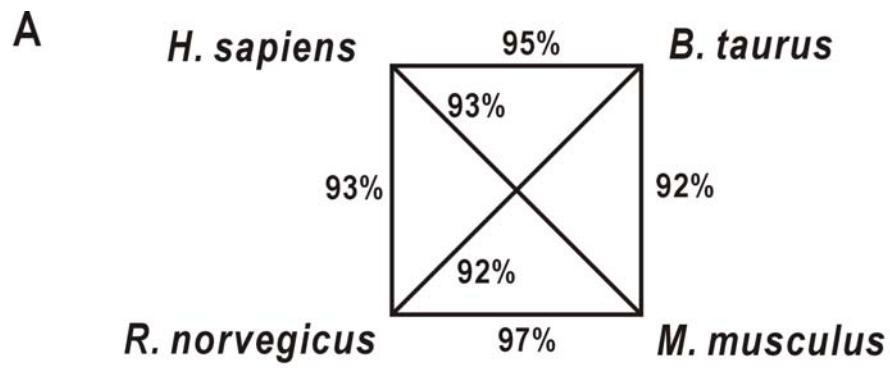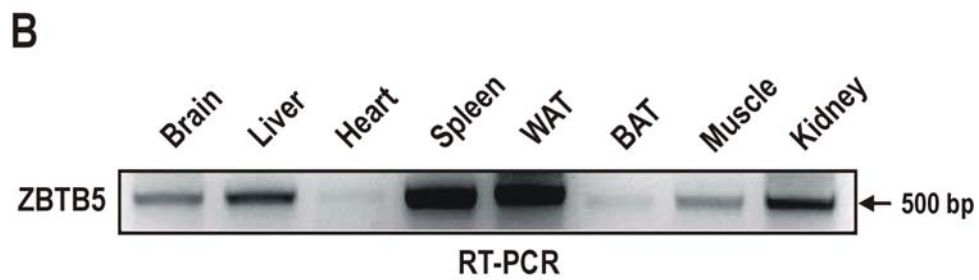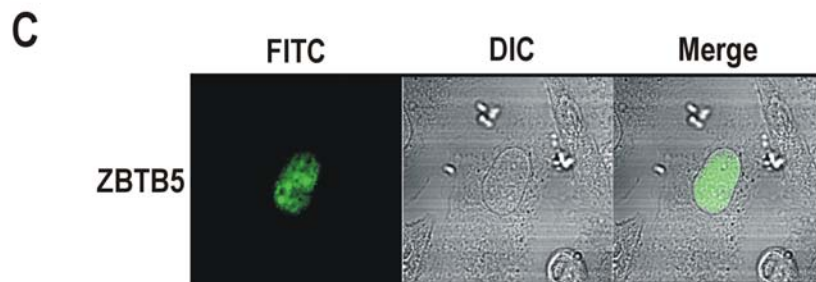

Supplement: supp_M109.025817_jbc.M109.025817-1.pdf [file supp_M109.025817_jbc.M109.025817-1.pdf]
